# Supplementary material
Source: PubMed Central journal article supplement (PMC7127969)
Supplement: NIHMS1569040-supplement-1.pdf [file NIHMS1569040-supplement-1.pdf]

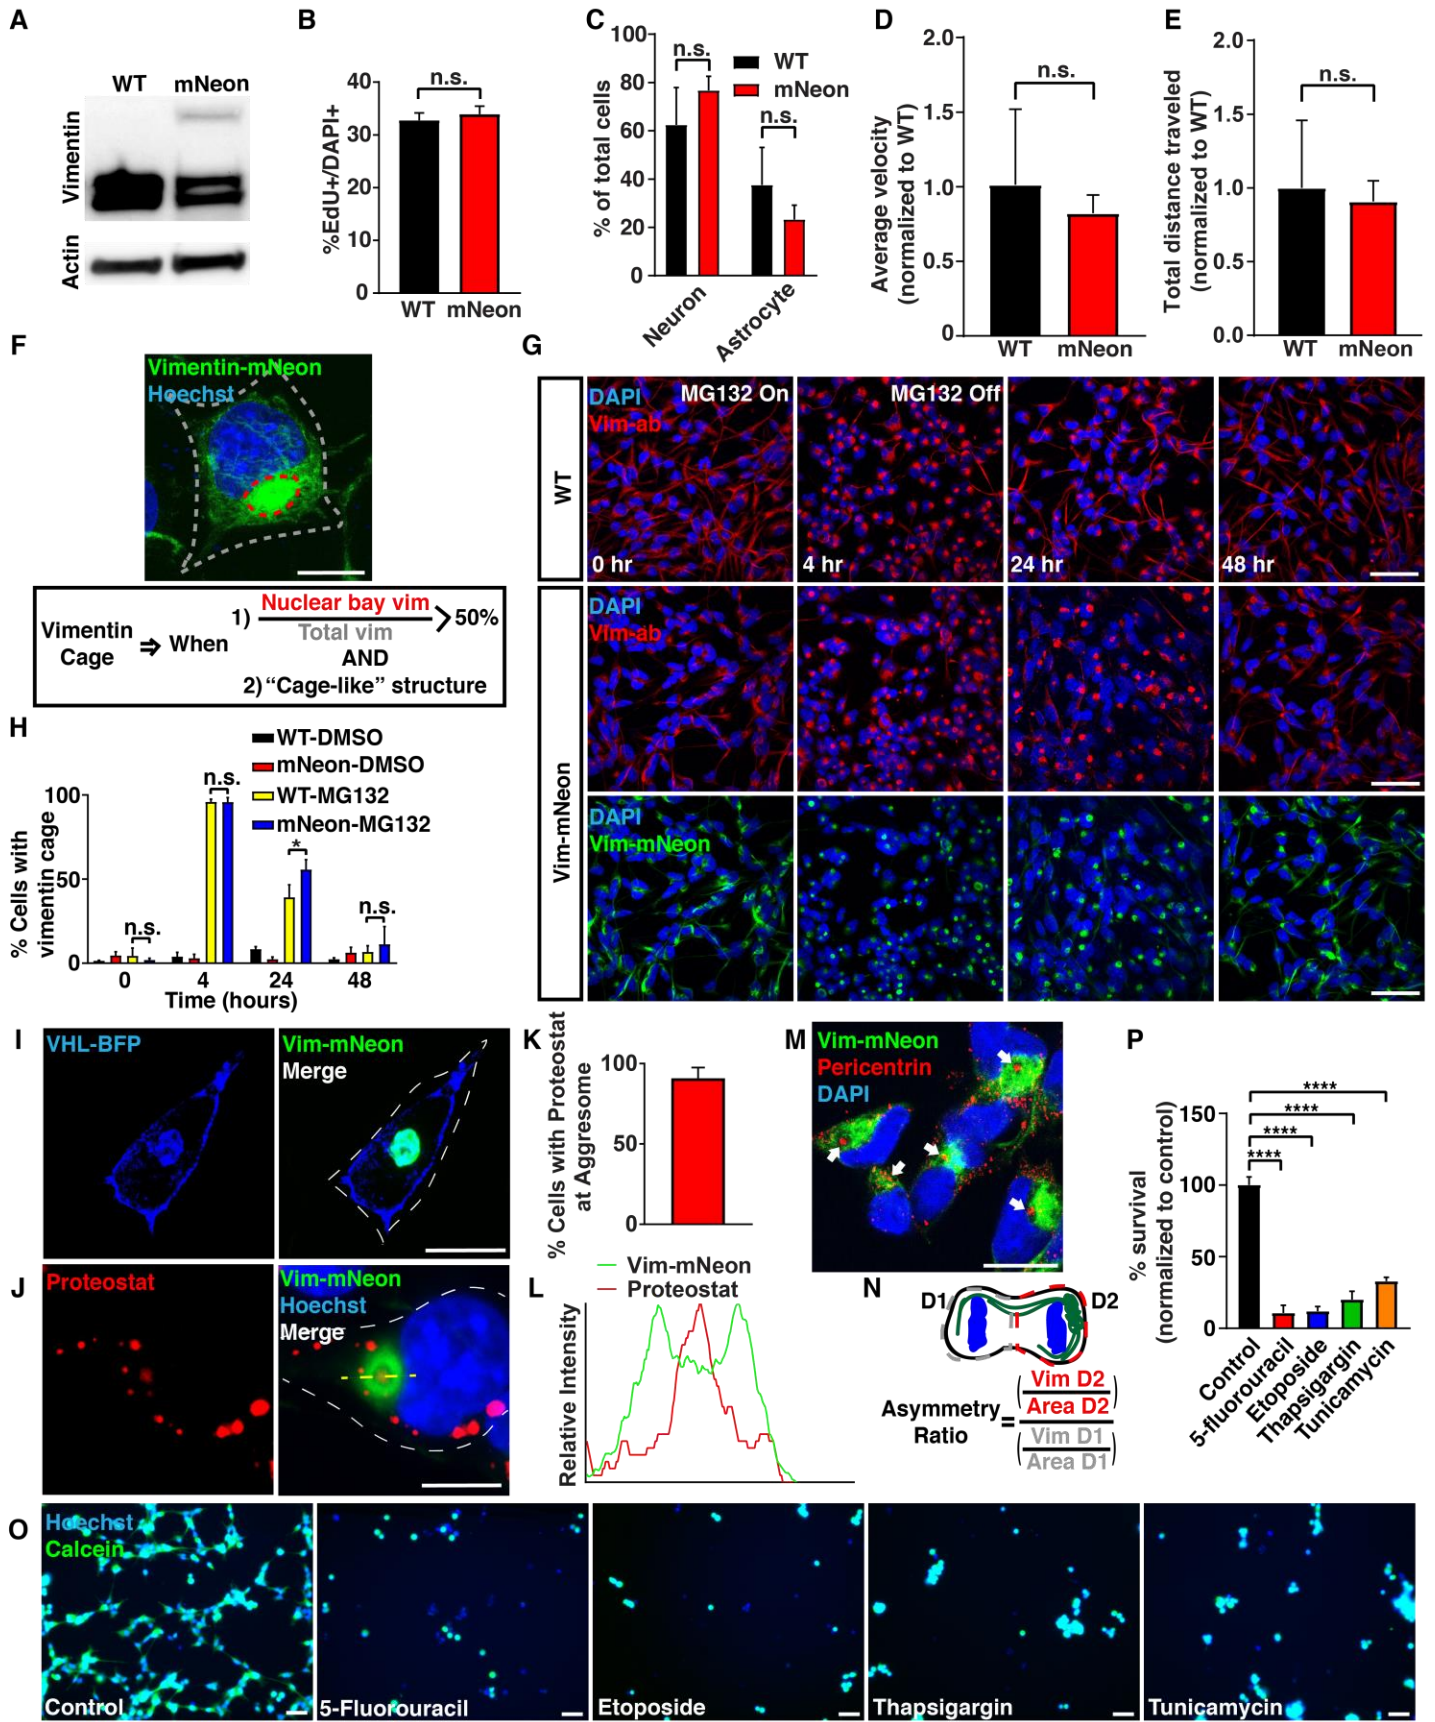

**Figure S1. Vimentin cages the aggresome in response to disruptions in proteostasis, Related to Figure 1.** A) Protein was extracted from WT and vimentin-mNeon NSCs and run on a western blot probing for vimentin and  $\beta$ -actin levels. B)

WT (black bar) and vimentin-mNeon (red bar) NSCs were pulsed with EdU for 1 hour and then fixed and analyzed for percent EdU<sup>+</sup> cells. (n=3; Student's t-test; mean ± SD). C) WT or vimentin-mNeon NSCs were differentiated for 14 days by removing growth factors, and then quantified for generation of neurons (MAP2ab) or astrocytes (GFAP). (n=3; Student's t-test; mean ± SD). D-E) WT and vimentin mNeon-NSC timelapse images were analyzed for average velocity or total distance traveled to quantify cell motility. (N=3; Student's t-test; mean ± SD). F-H) WT and Vimentin-mNeon NSCs (green) were treated with 5 μM MG132 for 4 hours to induce a transient loss of proteostasis, allowed to recover for up to 48 hours, and stained with a vimentin antibody to analyze the percentage of vimentin cages. (N=3; Two-way ANOVA with post-hoc Tukey's test; mean ± SD). I) Vimentin-mNeon NSCs (green) were electroporated with a construct expressing the mutant tumor suppressor Von Hippel-Lindau (VHL; blue) and imaged 24 hours later. J-K) Vimentin-mNeon NSCs were stressed with 5 μM MG132 for 4 hours and then immunostained for vimentin (green), stained with Proteostat (red), and quantified for the percentage of cells that had Proteostat puncta present at or within the vimentin cage. L) Intensity histogram along the yellow dotted line in J depicting vimentin and Proteostat fluorescence. M) Vimentin-mNeon NSCs were stressed with 5 μM MG132 for 2 hours and then immunostained for pericentrin (centrosome; red). White arrows indicate centrosomes. N) Schematic depicting quantitation of asymmetry during mitosis. O-P) Images and quantification of survival (living cells labeled by Calcein AM; green) of WT NSCs after modification of drug treatment stress paradigms that did not induce vimentin cage formation in initial experiments (50 nM 5-fluorouracil for 48 hours, 100 nM etoposide for 48 hours, 1 μg/mL tunicamycin for 9 hours, and 1 μM thapsigargin for 9 hours). (n=3; Two-way ANOVA with post-hoc Tukey's test; mean ± SD). Scale bars, 10 μm (I, J, M), 50 μm (G, O). Nuclei were labeled with DAPI or Hoechst (blue). White line denotes edge of the cell. \*p<0.05, \*\*\*\*p<0.0001.

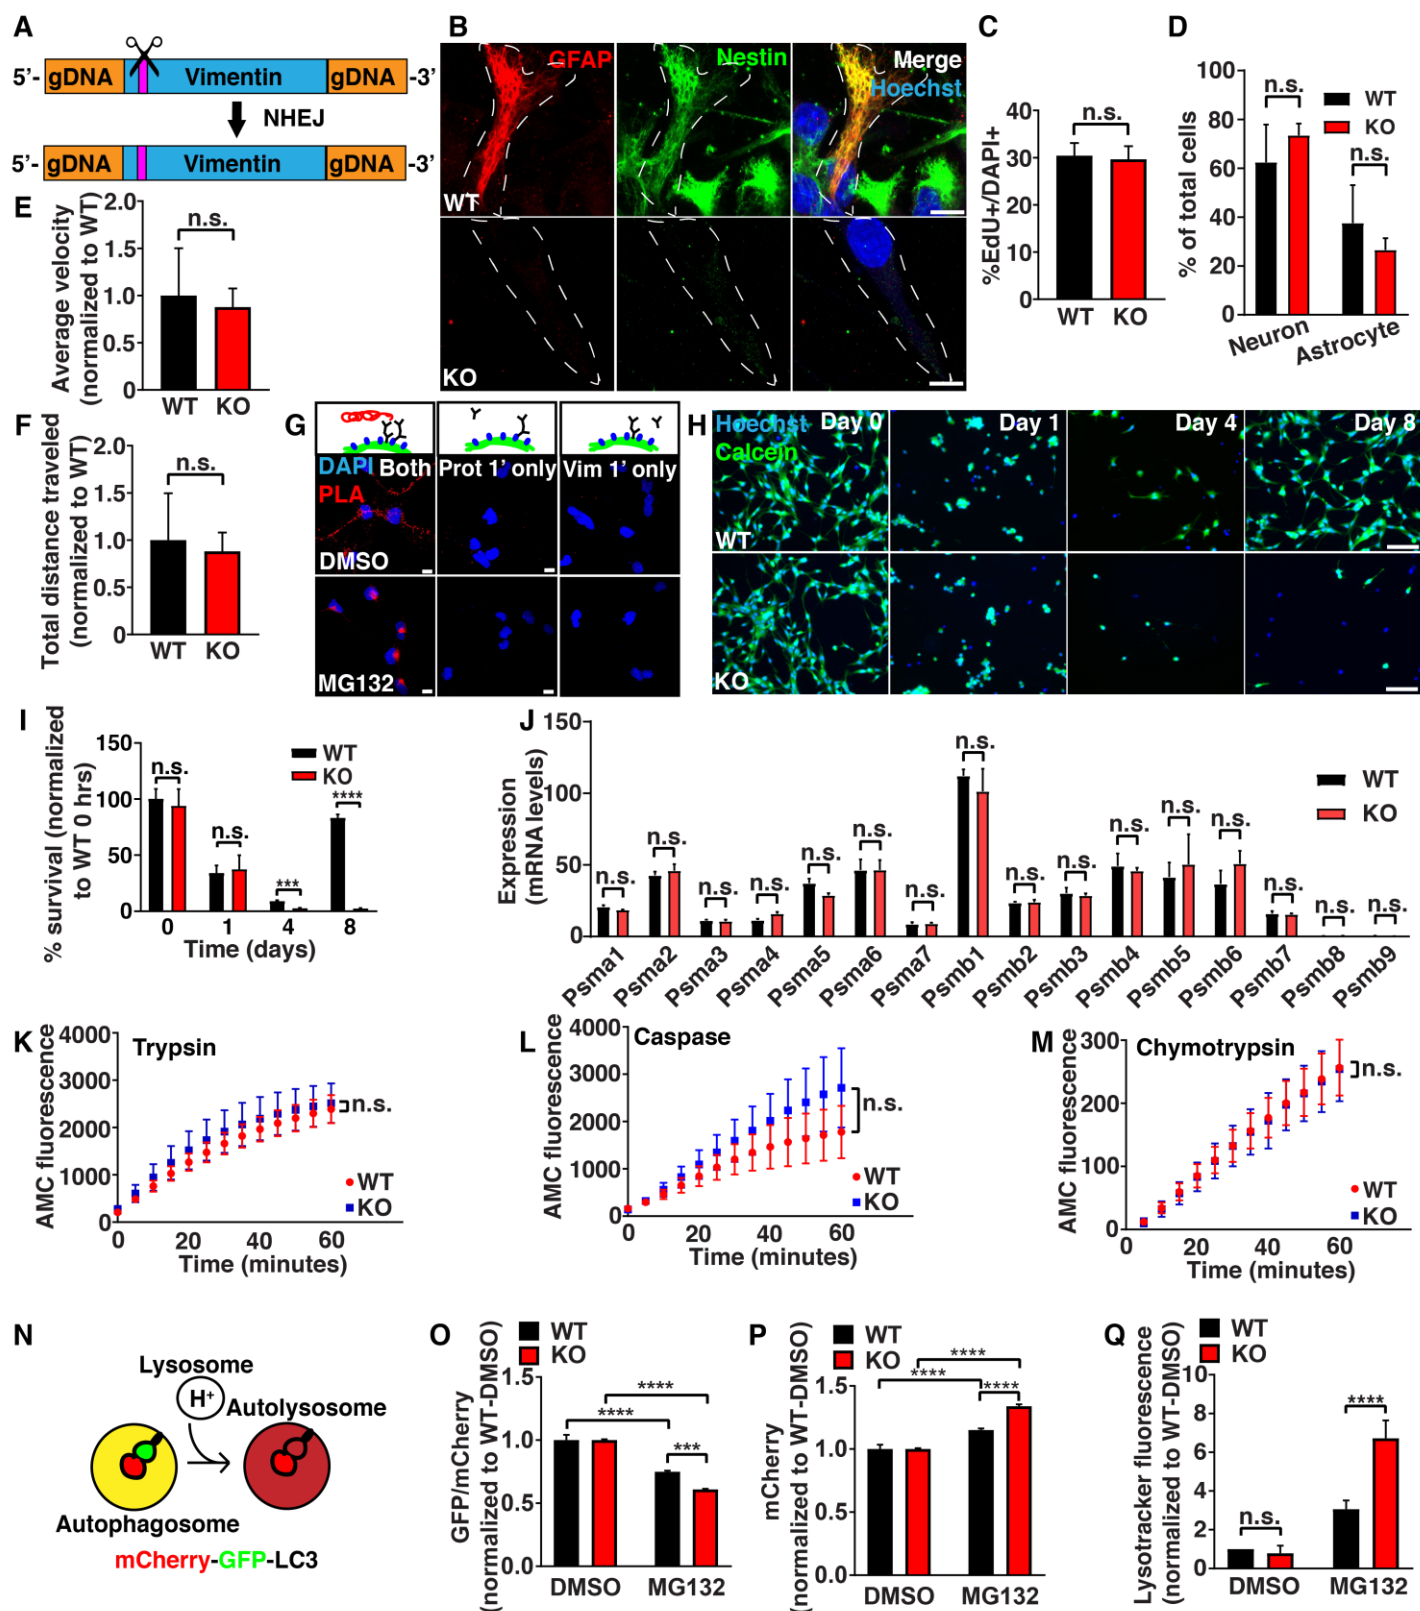

**Figure S2. Vimentin KO disrupts proteasome localization to the aggresome and decreases resilience to proteostasis disruption, Related to Figure 2.** A) Schematic of CRISPR/Cas9-based vimentin KO NSC generation strategy. B) WT and vimentin KO NSCs were immunostained for GFAP (red) and nestin (green). C) WT (black bar) and vimentin KO (red bar) NSCs were pulsed with EdU for 1 hour and then fixed and analyzed for percent EdU+ cells. (N=3; Student's t-test; mean ±

SD). D) WT or vimentin KO NSCs were differentiated for 14 days and then quantified for generation of neurons (MAP2ab) or astrocytes (GFAP). (n=3; Student's t-test; mean  $\pm$  SD). E-F) WT and vimentin mNeon-NSCs live-cell imaging timelapses were analyzed for average velocity or total distance traveled to quantify cell motility. (N=3; Student's t-test; mean  $\pm$  SD). G) (Controls for Fig. 2G) WT NSCs were treated with 0.05% DMSO or 5  $\mu$ M MG132 for 4 hours and then fixed and probed with a proximity ligation assay (red) against vimentin and the  $\alpha$ 5 subunit of the proteasome, with negative controls shown here using probes for only one antibody. H-I) WT (black bar) and vimentin KO (red bar) NSCs were treated transiently with 5  $\mu$ M MG132 for 8 hours and then were monitored for cell survival over the course of the following week (normalized to day 0). Living cells are labeled by calcein (green). (N=3; Two-way ANOVA with post-hoc Tukey's test; mean  $\pm$  SD). J) Proteasome subunit mRNA levels from total RNA sequencing data generated from WT and vimentin KO NSCs (n=3; Two-way ANOVA with post-hoc Tukey's test; mean  $\pm$  SD). K-M) Proteasome activity assays performed on protein lysates generated from WT (red) or vimentin KO (blue) NSCs measuring caspase-like, trypsin-like and chymotrypsin-like proteasome activity (N=3; Student's t-test; mean  $\pm$  SD). N-P) WT (black bar) and vimentin KO (red bar) NSCs were lentivirally transduced with mCherry-GFP-LC3. 7 days after viral transduction both cell types were treated either with 0.02% DMSO or 2  $\mu$ M MG132 for 24 hours and then were allowed to recover for 1 hour without drug before analyzing mCherry and GFP fluorescence. (N=3; Two-way ANOVA with post-hoc Tukey's test; mean  $\pm$  SD). Q) WT (black bar) and vimentin KO (red bar) NSCs were treated with 0.05% DMSO or 5  $\mu$ M MG132 for 4 hours and then allowed to recover for 2 hours before staining with the dye LysoTracker (lysosomes; red) (N=3; Two-way ANOVA with post-hoc Tukey's test; mean  $\pm$  SD). Nuclei were labeled with Hoechst (blue). Scale bars, 10  $\mu$ m (B), 100  $\mu$ m (H). White lines denote edge of the cell. \*\*\*p<0.001, \*\*\*\*p<0.0001.

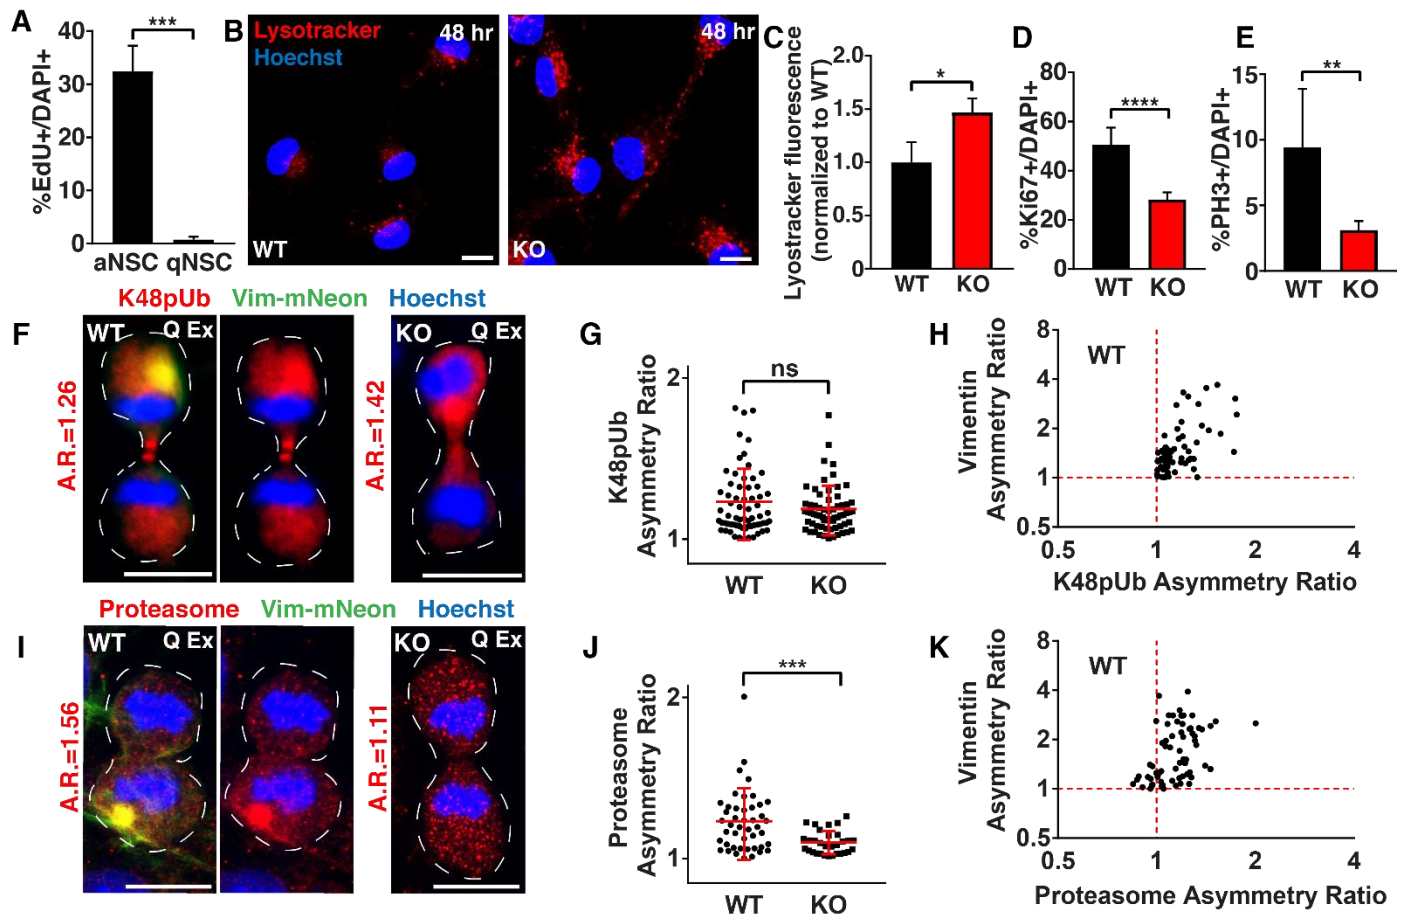

**Figure S3. Vimentin KO NSCs have a reduced capacity to clear protein and exit quiescence, and fail to asymmetrically segregate proteasomes during mitosis, Related to Figure 3.** A) aNSCs or qNSCs were pulsed with EdU for 1 hour and then fixed and analyzed for percent EdU+ cells. (n=3; Student's t-test; mean  $\pm$  SD). B-C) WT or vimentin KO NSCs exiting quiescence for 48 hours were stained with the dye Lyotracker (lysosomes; red). (N=3; Student's t-test; mean  $\pm$  SD). D-E) WT and vimentin KO NSCs exiting quiescence for 48 hours were fixed and immunostained for Ki67 (cells not in G<sub>0</sub>), and phosphohistone H3 (PH3; late G2/M phase). (n=3; Student's t-test; mean  $\pm$  SD). F-N) Vimentin-mNeon (WT; green) NSCs and vimentin KO NSCs exiting quiescence were immunostained for either F-H) K48pUb or I-K) proteasome. Asymmetry ratio (A.R.) of proteasome or K48pUb is indicated beside each image. (n $\geq$ 39; Mann-Whitney test; mean  $\pm$  SD). Nuclei are labeled by Hoechst. Scale bars, 10  $\mu$ m. \*p<0.05, \*\*p<0.01, \*\*\*p<0.001, \*\*\*\*p<0.0001.



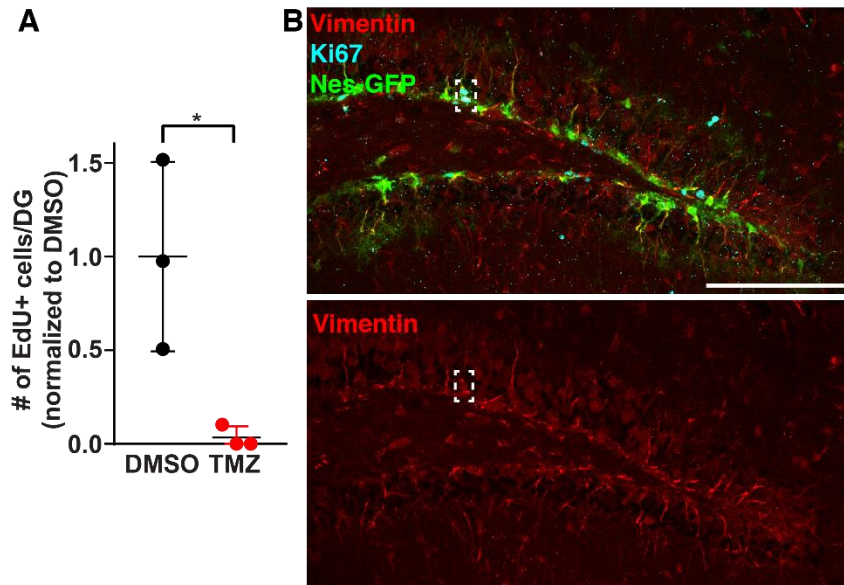

**Figure S4. Validation of temozolomide assay and vimentin immunostaining in the brain, Related to Figure 4.** A) WT mice were injected i.p. with DMSO (black bar) or 25 mg/kg TMZ (red bar) once per day for 3 consecutive days. They were allowed to recover for 2 hours before being injected with 50 mg/kg EdU once, and then were sacrificed 3 hours following the EdU injection and analyzed for proliferative (EdU+) NSCs. (n=3, Student's t-test; mean  $\pm$  SD). B) 7 week old Nestin-GFP mouse brain sections were immunostained for GFP (NSCs; green), vimentin (red) and Ki67 (cyan). Scale bar, 100  $\mu$ m. \*p<0.05.

## Supplementary Tables

Table S1. Intermediate filament expression in WT and vimentin KO NSCs. Related to Figure 2.

| Gene   | Name                            | WT Average | WT Stan. Dev. | KO Average | KO Stan. Dev. | Significant |
|--------|---------------------------------|------------|---------------|------------|---------------|-------------|
| Nes    | Nestin                          | 23.57      | 6.96          | 19.14      | 6.09          | no          |
| Gfap   | Glial fibrillary acidic protein | 42.82      | 0.92          | 14.91      | 1.19          | yes         |
| Vim    | Vimentin                        | 76.99      | 0.95          | 239.17     | 29.65         | yes         |
| Des    | Desmin                          | 0.09       | 0.07          | 0.07       | 0.05          | no          |
| Nefl   | Neurofilament-L                 | 0.00       | 0.00          | 0.02       | 0.02          | no          |
| Nefm   | Neurofilament-M                 | 0.03       | 0.02          | 0.03       | 0.02          | no          |
| Nefh   | Neurofilament-H                 | 0.09       | 0.05          | 0.04       | 0.03          | no          |
| Lmna   | Lamin A                         | 2.66       | 0.62          | 2.17       | 0.17          | no          |
| Lmnb1  | Lamin B1                        | 33.84      | 6.60          | 32.21      | 2.59          | no          |
| Lmnb2  | Lamin B2                        | 5.80       | 0.27          | 7.22       | 0.97          | no          |
| Synm   | Synemin                         | 0.49       | 0.14          | 0.42       | 0.06          | no          |
| Ina    | Internexin                      | 0.93       | 0.09          | 0.70       | 0.09          | no          |
| Bfsp1  | Filensin                        | 0.01       | 0.01          | 0.02       | 0.01          | no          |
| Bfsp2  | Phakinin                        | 3.25       | 0.20          | 1.37       | 0.45          | no          |
| Sync   | Syncoilin                       | 0.36       | 0.19          | 0.25       | 0.04          | no          |
| Prph   | Peripherin                      | 0.12       | 0.09          | 0.04       | 0.03          | no          |
| Krt1   | Keratin 1                       | 0.02       | 0.02          | 0.07       | 0.04          | no          |
| Krt10  | Keratin 10                      | 1.31       | 0.25          | 1.16       | 0.13          | no          |
| Krt13  | Keratin 13                      | 0.00       | 0.00          | 0.00       | 0.00          | no          |
| Krt17  | Keratin 17                      | 0.00       | 0.00          | 0.03       | 0.02          | no          |
| Krt18  | Keratin 18                      | 0.02       | 0.02          | 0.00       | 0.00          | no          |
| Krt2   | Keratin 2                       | 0.00       | 0.00          | 0.01       | 0.01          | no          |
| Krt20  | Keratin 20                      | 0.02       | 0.03          | 0.00       | 0.00          | no          |
| Krt222 | Keratin 222                     | 0.22       | 0.14          | 0.13       | 0.04          | no          |
| Krt24  | Keratin 24                      | 0.00       | 0.00          | 0.02       | 0.02          | no          |
| Krt25  | Keratin 25                      | 0.00       | 0.00          | 0.00       | 0.00          | no          |
| Krt26  | Keratin 26                      | 0.00       | 0.00          | 0.01       | 0.02          | no          |
| Krt28  | Keratin 28                      | 0.40       | 0.14          | 0.18       | 0.01          | no          |
| Krt33b | Keratin 33B                     | 0.00       | 0.00          | 0.00       | 0.00          | no          |
| Krt34  | Keratin 34                      | 0.00       | 0.00          | 0.00       | 0.00          | no          |
| Krt35  | Keratin 35                      | 0.00       | 0.00          | 0.00       | 0.00          | no          |
| Krt40  | Keratin 40                      | 0.01       | 0.01          | 0.00       | 0.00          | no          |
| Krt7   | Keratin 7                       | 0.00       | 0.00          | 0.00       | 0.00          | no          |
| Krt73  | Keratin 73                      | 0.00       | 0.00          | 0.05       | 0.02          | no          |
| Krt78  | Keratin 78                      | 0.00       | 0.00          | 0.01       | 0.01          | no          |
| Krt8   | Keratin 8                       | 0.02       | 0.03          | 0.00       | 0.00          | no          |
| Krt80  | Keratin 80                      | 0.01       | 0.01          | 0.02       | 0.02          | no          |
| Krt82  | Keratin 82                      | 0.00       | 0.00          | 0.03       | 0.04          | no          |
| Krt83  | Keratin 83                      | 0.00       | 0.00          | 0.01       | 0.02          | no          |
| Krt84  | Keratin 84                      | 0.01       | 0.01          | 0.00       | 0.00          | no          |

|       |            |      |      |      |      |    |
|-------|------------|------|------|------|------|----|
| Krt86 | Keratin 86 | 0.00 | 0.01 | 0.00 | 0.00 | no |
| Krt87 | Keratin 87 | 0.05 | 0.07 | 0.00 | 0.00 | no |
| Krt80 | Keratin 80 | 0.01 | 0.01 | 0.02 | 0.02 | no |
| Krt82 | Keratin 82 | 0.00 | 0.00 | 0.03 | 0.04 | no |
| Krt83 | Keratin 83 | 0.00 | 0.00 | 0.01 | 0.02 | no |
| Krt84 | Keratin 84 | 0.01 | 0.01 | 0.00 | 0.00 | no |
| Krt86 | Keratin 86 | 0.00 | 0.01 | 0.00 | 0.00 | no |
| Krt87 | Keratin 87 | 0.05 | 0.07 | 0.00 | 0.00 | no |

Table S2. Proteins co-precipitated by vimentin-mNeon in either a DMSO or MG132 treated condition, followed by LC-MS/MS (attached as excel file). Related to Figure 2.

Table S3. Total RNA sequencing data from untreated WT and vimentin KO NSCs (attached as excel file). Related to Figure 2.
